# Supplementary material for: Surgery-induced neuroinflammatory transcriptional programs in medial prefrontal cortex of mice during early phase of perioperative neurocognitive disorders
Source: PeerJ journal article supplement (doi:10.7717/peerj.18664), 2024-12-03
Supplement: MIQE_checklist.xls [file MIQE_checklist.xls]

## Sheet: Sheet1
ITEM TO CHECK	IMPORTANCE	CHECKLIST
EXPERIMENTAL DESIGN
Definition of experimental and control groups	E	line 73-75
Number within each group	E	line 73-75
Assay carried out by core lab or investigator's lab?	D	investigator's lab
Acknowledgement of authors' contributions	D	line 354
SAMPLE
Description	E	line 180-184
Volume/mass of sample processed	D	/
Microdissection or macrodissection	E	line 180-184
Processing procedure	E	line 178-180
If frozen - how and how quickly?	E	line 178-180
If fixed - with what, how quickly?	E	Not fixed
Sample storage conditions and duration (especially for FFPE samples)	E	line 179-180
NUCLEIC ACID EXTRACTION
Procedure and/or instrumentation	E	line 134-136
Name of kit and details of any modifications	E	line 136. We exactly followed the manufacture's protocol.
Source of additional reagents used	D	Chloroform, isopropyl alcohol, Ethanol (Provided by the laboratory); DEPC-Treated Water (Beyotime, China)
Details of DNase or RNAse treatment	E	line 135-136
Contamination assessment (DNA or RNA)	E	line 136-138
Nucleic acid quantification	E	line 136-138
Instrument and method	E	line 136-138
Purity (A260/A280)	D	/
Yield	D	/
RNA integrity method/instrument	E	line 136-138
RIN/RQI or Cq of 3' and 5' transcripts	E	line 138
Electrophoresis traces	D	/
Inhibition testing (Cq dilutions, spike or other)	E	Considering the high quality of the starting RNA, the standard curve is considered to exclude the existence of reverse transcription activity or PCR inhibitors.
REVERSE TRANSCRIPTION
Complete reaction conditions	E	line 163-164. Reverse transcription was carried out in 20ul reaction volume. Briefly, 1ug RNA templete, 4ul 4x ×DN Master Mix , 4ul 5xRT Master Ⅱ and 11ul nuclease-free water were mixed well, then the reaction mixtures were performed using the following conditions: 37°C for 5 min, 37°C for 15 min, followed by 98°C 5min and then held at 4°C.
Amount of RNA and reaction volume	E	line 163-164. Amount of RNA: 1ug; Reaction volume: 20ul
Priming oligonucleotide (if using GSP) and concentration	E	Oligo dTprimer: 50pmol/20ul reaction system
Reverse transcriptase and concentration	E	line 164. ReverTra Ace
Temperature and time	E	37°C for 5 min, 37°C for 15 min, followed by 98°C 5min and then held at 4°C
Manufacturer of reagents and catalogue numbers	D	line 163-164
Cqs with and without RT	D*	/
Storage conditions of cDNA	D	–20 ℃
qPCR TARGET INFORMATION
If multiplex, efficiency and LOD of each assay.	E	Generally, it can be verified by repeated experiments.
Sequence accession number	E	SUP T1
Location of amplicon	D	/
Amplicon length	E	SUP T1
In silico specificity screen (BLAST, etc)	E	BLAST verified the specificity of primers
Pseudogenes, retropseudogenes or other homologs?	D	/
Sequence alignment	D	/
Secondary structure analysis of amplicon	D	/
Location of each primer by exon or intron (if applicable)	E	Not applicable
What splice variants are targeted?	E	Not applicable
qPCR OLIGONUCLEOTIDES
Primer sequences	E	SUP T1
RTPrimerDB Identification Number	D	/
Probe sequences	D**	Not applicable
Location and identity of any modifications	E	Design primers near the 3' end
Manufacturer of oligonucleotides	D	/
Purification method	D	PAGE
qPCR PROTOCOL
Complete reaction conditions	E	line 164-168. RT-qPCR was carried out using SYBR Premix EX TaqTM II kit in 10ul reaction volumes. In brief, each reaction was comprised of 1ul of the cDNA solution, 5ul of SYBRGreen Master, 0.6ul of primers and 3.4ul of nuclease-free water. All RT-qPCR reactions were performed on QuantStudio5 thermocycler (Thermo Fisher Scientific), using the following conditions: 95°C for 30 s, followed by 40 cy…
Reaction volume and amount of cDNA/DNA	E	Reaction volume: 10ul; amount of cDNA: 1ul.
Primer, (probe), Mg++ and dNTP concentrations	E	0.3uM Primers; 2 mM MgCl2; 0.2 mM dNTP
Polymerase identity and concentration	E	FastStart Taq
Buffer/kit identity and manufacturer	E	line 165-166
Exact chemical constitution of the buffer	D	NA
Additives (SYBR Green I, DMSO, etc.)	E	SYBR Green I
Manufacturer of plates/tubes and catalog number	D	/
Complete thermocycling parameters	E	line 167-168
Reaction setup (manual/robotic)	D	/
Manufacturer of qPCR instrument	E	line 165
qPCR VALIDATION
Evidence of optimisation (from gradients)	D	/
Specificity (gel, sequence, melt, or digest)	E	Specificity was confirmed by melt curve analyses.
For SYBR Green I, Cq of the NTC	E	The signal of the amplification plot was very late (Cq>38)
Standard curves with slope and y-intercept	E	Slopes of calibration curves were all between 3.1 and 3.6 and a y-intercept around 33.
PCR efficiency calculated from slope	E	PCR efficiency ranged from 92%-98%.
Confidence interval for PCR efficiency or standard error	D	/
r2 of standard curve	E	The each r2 values of our calibration curve was almost greater than 0.99.
Linear dynamic range	E	Linear across 4 log quantities
Cq variation at lower limit	E	The variation in each Cq values at the limit of detection (LOD) were less than 20%, which were within the acceptable range for qPCR assays, suggesting good reproducibility.
Confidence intervals throughout range	D	/
Evidence for limit of detection	E	Not applicable
If multiplex, efficiency and LOD of each assay.	E	Not applicable
DATA ANALYSIS
qPCR analysis program (source, version)	E	QuantStudio5 thermocycler (Thermo Fisher Scientific)
Cq method determination	E	Raw data in supplementary files. The threshold was defined as the fractiona cycle number at which the fluorescenceexceeded the given threshold and was calculated using QuantStudio5 thermocycler using the automatic baseline setting.
Outlier identification and disposition	E	If the amplification curve, melt curve and cq value are abnormal, it is necessary to explore the experimental conditions again.
Results of NTCs	E	The signal of the amplification plot was very late (Cq>38) and therefore there was a high Cq value difference between the negative control and all the cDNA samples.
Justification of number and choice of reference genes	E	GAPDH
Description of normalisation method	E	line 169-171
Number and concordance of biological replicates	D	SUP T1
Number and stage (RT or qPCR) of technical replicates	E	RT-qPCR reactions were performed in triplicate.
Repeatability (intra-assay variation)	E	Mean standard deviation of triplicates: less than 0.10
Reproducibility (inter-assay variation, %CV)	D	/
Power analysis	D	/
Statistical methods for result significance	E	line 194-196
Software (source, version)	E	line 192-193
Cq or raw data submission using RDML	D	/
Table 1. MIQE checklist for authors, reviewers and editors. All essential information (E) must be submitted with the manuscript. Desirable
information (D) should be submitted if available. If using primers obtained from RTPrimerDB, information on qPCR target, oligonucleotides,
protocols and validation is available from that source.
*: Assessing the absence of DNA using a no RT assay is essential when first extracting RNA. Once the sample has been validated as
RDNA-free, inclusion of a no-RT control is desirable, but no longer essential.
**: Disclosure of the probe sequence is highly desirable and strongly encouraged. However, since not all commercial pre-designed assay
vendors provide this information, it cannot be an essential requirement. Use of such assays is advised against.
