# Supplementary material for: Surgery-induced neuroinflammatory transcriptional programs in medial prefrontal cortex of mice during early phase of perioperative neurocognitive disorders
Source: PeerJ journal article supplement (doi:10.7717/peerj.18664), 2024-12-03
Supplement: raw_data.zip [file raw_data.zip]

## Sheet: serum-IL6
IL-6 concentration (pg/ml)	Control	Surgery
	14.851	64.045
	19.092	121.721
	24.181	69.134
	14.851	79.312
	31.814	85.25
	19.94	132.748

## Sheet: mPFC-IL6
IL-6 concentration (pg/mg)	Control	Surgery
	7.92801	9.94222
	3.85205	10.4039
	5.95435	11.1916
	6.79686	10.9557
	3.77235	14.9263
	3.5303	7.88979
		7.30006

## Sheet: Contextual text
frezzing time (% of total)	Control	Surgery
	55.7	10.8
	42.5	22.5
	25.6	32.4
	36.9	41.6
	41.4	12.5
	43.1	22.8
	52.4	11.5
	43.2	21.2
	61.5	31.5
	62.1	33.8
	45.8	15.8

## Sheet: Tone text
frezzing time (% of total)	Control	Surgery
	73.1	12.3
	69.6	38.8
	64.1	21.5
	42.2	11.5
	35.7	14.5
	52.6	45.9
	24.4	62
	51.2	19.2
	26.2	18.5
	29.4	22.5
	54.3	5.9

## Sheet: Time in the center
Time in the center (s)	Control	Surgery
	94.8	29.3
	110.1	21.4
	90.3	34.4
	38.6	107.8
	66.8	90.2
	45.1	155.4
	82.4	48.1
	167.1	69.2
	29.3	66.2
	104.2	43.4

## Sheet: Total distance
Total distance (cm)	Control	Surgery
	3016.7	2648.5
	2119.2	3333.2
	3508.5	2868.2
	4047.4	2907.1
	2107.8	3038
	2046.2	1604.3
	3038	2737.1
	2082.3	3555.1
	3616.1	2380.1
	1794.3	2681.3

## Sheet: Up genes
Fold change	Control			Surgery
Vipr2	1.03377	0.357546	2.70547	8.06327	13.0471	8.35775
Lcn2	0.657065	0.872255	1.74481	9.2183	10.0847	6.09969
Cxcl5	1.86589	0.733461	0.730695	7.12619	5.8475	5.75461
Ccl21c	0.893376	1.0506	1.06543	3.14095	6.74323	4.67584
Ttr	1.77979	1.17467	0.478314	3.64058	6.27759	3.91892
Cybb	0.817432	1.70765	0.71639	3.63114	3.57629	2.6888
Ano2	1.89288	1.04071	0.50763	2.56744	3.32216	3.29536
Scgn	0.540483	1.13971	1.62339	3.48768	2.74944	2.63745
Lrg1	1.5272	0.761237	0.860168	2.54154	3.25589	2.92231
Cd28	1.54754	0.737797	0.875835	2.67452	2.52788	2.36452

## Sheet: Down genes
Fold change	Control			Surgery
Nts	1.37721	1.00637	0.721508	0.246982	0.148413	0.5293
Gh	1.30139	1.10807	0.693471	0.355724	0.553463	0.260957
Stat4	1.10597	0.906775	0.997143	0.221422	0.51516	0.480993
Htr1d	1.38414	0.912769	0.791517	0.337574	0.502788	0.360849
Agt	1.05898	0.875244	1.07891	0.350918	0.407104	0.463088

## Sheet: Relative IL-6 mRNA
Fold change	Control	Surgery
	1.06819	1.21342
	1.15668	1.15357
	0.809353	1.2147

## Sheet: Relative TNF-α mRNA
Fold change	Control	Surgery
	0.89658	0.86679
	1.41946	1.12646
	0.785755	0.846918

[truncated: 1 more sheets: Relative Il-1β mRNA]
