# Supplementary material for: Surgery-induced neuroinflammatory transcriptional programs in medial prefrontal cortex of mice during early phase of perioperative neurocognitive disorders
Source: PeerJ journal article supplement (doi:10.7717/peerj.18664), 2024-12-03
Supplement: Supplemental_Table_S1.docx [file Supplemental_Table_S1.docx]

**Table. S1 Primers used in the study for qRT-PCR**

| **Gene ID** | **Gene symbol** | **Primer sequence (5’-3’)** |
| --- | --- | --- |
| 22139 | *Ttr* | (F): TTGCCTCGCTGGACTGGTA  (R): TTACAGCCACGTCTACAGCAG |
| 13058 | *Cybb* | (F): TGTGGTTGGGGCTGAATGTC  (R): CTGAGAAAGGAGAGCAGATTTCG |
| 22355 | *Vipr2* | (F): GACCTGCTACTGCTGGTTG  (R): CAGCTCTGCACATTTTGTCTCT |
| 214189 | *Scgn* | (F): ATGGACAACGCACGCAGAAA  (R): TCCTCAGTGCCAGATTTTGCC |
| 243634 | *Ano2* | (F): TTTATGATTGCCCTGACGTTCTC  (R): GAGGTTGATGATGACTGCTGTT |
| 16819 | *Lcn2* | (F): GCAGGTGGTACGTTGTGGG  (R): CTCTTGTAGCTCATAGATGGTGC |
| 20311 | *Cxcl5* | (F): TCCAGCTCGCCATTCATGC  (R): TTGCGGCTATGACTGAGGAAG |
| 65956 | *Ccl21c* | (F): GTGATGGAGGGGGTCAGGA  (R): GGGATGGGACAGCCTAAACT |
| 76905 | *Lrg1* | (F): TTGGCAGCATCAAGGAAGC  (R): CAGATGGACAGTGTCGGCA |
| 12487 | *Cd28* | (F): GTTCTTGGCTCTCAACTTCTTCT  (R): TGAGGCTGACCTCGTTGCTAT |
| 14599 | *Gh* | (F): GCTACAGACTCTCGGACCTC  (R): CGGAGCACAGCATTAGAAAACAG |
| 20849 | *Stat4* | (F): TGGCAACAATTCTGCTTCAAAAC  (R): GAGGTCCCTGGATAGGCATGT |
| 15552 | *Htr1d* | (F): ATCACCGATGCCCTGGAGTA  (R): GCCAGAAGAGTGGAGGGATG |
| 67405 | *Nts* | (F): GCAAGTCCTCCGTCTTGGAAA  (R): TGCCAACAAGGTCGTCATCAT |
| 11606 | *Agt* | (F): TCTCCTTTACCACAACAAGAGCA  (R): CTTCTCATTCACAGGGGAGGT |
| 14433 | *Gapdh* | (F): AGGTCGGTGTGAACGGATTTG  (R): TGTAGACCATGTAGTTGAGGTCA |
| 16193 | *Il-6* | (F): TAGTCCTTCCTACCCCAATTTCC  (R): TTGGTCCTTAGCCACTCCTTC |
| 21926 | *Tnf-α* | (F): CTGAACTTCGGGGTGATCGG  (R): GGCTTGTCACTCGAATTTTGAGA |
| 16176 | *Il-1β* | (F): GAAATGCCACCTTTTGACAGTG  (R): TGGATGCTCTCATCAGGACAG |
