# Supplementary material for: Surgery-induced neuroinflammatory transcriptional programs in medial prefrontal cortex of mice during early phase of perioperative neurocognitive disorders
Source: PeerJ journal article supplement (doi:10.7717/peerj.18664), 2024-12-03
Supplement: Supplemental_Table_S2.xlsx [file Supplemental_Table_S2.xlsx]

## Sheet: 1696927406555_1664194629001
Gene ID	Gene Symbol	Type	Control Average Read Count	Surgery Average Read Count	log2 (Surgery / Control)	Pvalue(Surgery / Control)	Qvalue (Surgery / Control)
100039175	'Gm9780'	mRNA	21.39	6.72	-1.66004	1.06295e-06	1.46966e-05
100039796	'Tgtp2'	mRNA	30.7767	13.33	-1.19679	4.81912e-06	5.83492e-05
100039863	'Gm13306'	mRNA	199.037	15.2433	-3.69642	5.68367e-120	6.42293e-117
100040926	'Gm3045'	lncRNA	6.66667	1.33333	-2.31156	0.000703114	0.00471926
100042304	'Gm38418'	mRNA	0.496667	9.93333	4.33229	4.22303e-08	7.4645e-07
100043914	'Zfp968'	mRNA	0	5.77	5.1239	1.6508e-05	0.000176994
100169868	'Gm3173'	mRNA	2.21667	7.66333	1.79995	0.00192125	0.0110773
100384868	'Gm37013'	mRNA	22.6133	48.7767	1.11938	4.34029e-08	7.64785e-07
100470	'Lao1'	mRNA	0.666667	4	2.59533	0.00486998	0.0239834
100502825	'Rpl37rt'	mRNA	10.3467	1.75	-2.55337	7.76987e-06	8.99639e-05
100503605	'Hbb-bs'	mRNA	172.703	73.75	-1.21721	4.8987e-28	5.00228e-26
100503949	'Zfp965'	mRNA	11.82	3.69	-1.66917	0.00027102	0.00206474
100504239	'Gm10591'	mRNA	7.66	19.5	1.35842	5.54058e-05	0.000511956
100504263	'2210418O10Rik'	mRNA	64.8567	129.003	1.00245	3.98335e-16	1.81024e-14
100504346	'Gm13304'	mRNA	7.66	19.5	1.35842	5.54058e-05	0.000511956
100861702	'Gm21149'	mRNA	0.333333	4	3.59533	0.00103885	0.00662012
100861978	'LOC100861978'	mRNA	87.0633	252.957	1.54912	9.17026e-58	2.98933e-55
100862177	'Gm21541'	mRNA	7.66	19.5	1.35842	5.54058e-05	0.000511956
100862261	'Fam205a3'	mRNA	233.533	84.7	-1.45283	1.89755e-48	4.80081e-46
101488143	'Hbb-bt'	mRNA	27.6533	11.89	-1.20734	1.27418e-05	0.00014025
101488212	'Evi2'	mRNA	0	8.07333	5.60849	2.92907e-07	4.5761e-06
103611158	'Gm38666'	mRNA	10.6733	23.1267	1.12591	0.000151487	0.00124593
103611159	'Gm38667'	mRNA	16.67	46.4	1.48724	2.76919e-11	7.27761e-10
105244034	'LOC105244034'	mRNA	0.973333	6.42	2.73193	0.000245567	0.00190682
105246138	'Gm41476'	mRNA	1.1	4.88333	2.16073	0.00522952	0.025429
107527	'Il1rl2'	mRNA	18.3333	8.66667	-1.07055	0.00125241	0.00771423
108167434	'Gm45988'	mRNA	11.11	24.3067	1.13986	8.75653e-05	0.000768281
108167809	'Gm46223'	mRNA	1.91667	9.19	2.27183	7.78037e-05	0.000693038
108167922	'LOC108167922'	mRNA	0	2.99333	4.17708	0.00288053	0.0154323
108168003	'Gm46353'	mRNA	9.48	1.72667	-2.44653	2.94594e-05	0.000296184
108912	'Cdca2'	mRNA	5	12	1.2734	0.00262387	0.0143359
109637	'Upk1a'	mRNA	13	3.66667	-1.8156	5.12333e-05	0.000479016
109660	'Ctrl'	mRNA	6.33333	2	-1.6526	0.00812805	0.0362575
110083	'Dnah12'	mRNA	3.66667	9.66667	1.40892	0.00351833	0.018255
110257	'Hba-a2'	mRNA	113.257	49.0267	-1.19759	1.69111e-18	9.61948e-17
110895	'Slc9a4'	mRNA	8.66667	22	1.35432	1.93456e-05	0.000203428
11537	'Cfd'	mRNA	11.3333	23.3333	1.05219	0.000315722	0.00236806
11606	'Agt'	mRNA	116	54	-1.09273	1.54808e-16	7.39198e-15
11615	'Gm4737'	mRNA	0.513333	3.4	2.73793	0.00754994	0.0342373
117591	'Slc2a9'	mRNA	8	18	1.18029	0.000518554	0.00363223
11937	'Atp2a1'	mRNA	3.33333	15.6667	2.24303	3.0743e-07	4.78096e-06
12487	'Cd28'	mRNA	5.66667	12	1.09283	0.00771924	0.0348419
12715	'Ckm'	mRNA	0.666667	3.66667	2.4698	0.00874985	0.0384046
12803	'Cntf'	mRNA	9.33333	19.6667	1.08566	0.000692845	0.00465863
12959	'Cryba4'	mRNA	7.33333	2.66667	-1.44906	0.00968466	0.0418307
13041	'Ctsw'	mRNA	6.66667	1.33333	-2.31156	0.000703114	0.00471926
13058	'Cybb'	mRNA	3	12.6667	2.08837	1.07379e-05	0.000120223
13106	'Cyp2e1'	mRNA	6	12.3333	1.0499	0.00894561	0.0390817
13190	'Dct'	mRNA	36.6667	16.3333	-1.15628	1.19816e-06	1.64187e-05
13363	'Dhh'	mRNA	2.66667	8	1.59533	0.00360696	0.0185897
13394	'Dlx4'	mRNA	4.33333	1	-2.10511	0.00992546	0.0427021
13409	'Tmc1'	mRNA	5	1	-2.31156	0.00334185	0.0174947
13411	'Dnah11'	mRNA	2.45667	17.5567	2.84761	5.82369e-10	1.31448e-08
13491	'Drd4'	mRNA	3	7.66667	1.364	0.0112181	0.0471448
13611	'S1pr4'	mRNA	11.3333	4.66667	-1.26974	0.0036504	0.0187793
13813	'Eomes'	mRNA	2.66667	28.3333	3.41976	1.13627e-17	6.15362e-16
14239	'Foxs1'	mRNA	9.33333	4	-1.21203	0.0109791	0.0463066
14559	'Gdf1'	mRNA	0	214.923	11.9869	3.15528e-78	1.62076e-75
14599	'Gh'	mRNA	13.3333	3.33333	-1.98963	1.29387e-05	0.000142233
14652	'Glp1r'	mRNA	1	5.33333	2.4254	0.00175399	0.0102665
15077	'Hist2h3c1'	mRNA	0	15.6733	6.56557	1.38104e-12	4.22563e-11
15401	'Hoxa4'	mRNA	4.33333	0	-4.69007	0.00024212	0.00188265
15402	'Hoxa5'	mRNA	9.66667	0.333333	-4.84761	3.51461e-08	6.28441e-07
15410	'Hoxb3'	mRNA	3	0.333333	-3.15956	0.00731293	0.0333006
15413	'Hoxb5'	mRNA	14.6667	0	-6.44906	7.61328e-12	2.1473e-10
15423	'Hoxc4'	mRNA	9	0.333333	-4.74452	1.15267e-07	1.91935e-06
15424	'Hoxc5'	mRNA	2.66667	0	-3.98963	0.0056851	0.0272149
15552	'Htr1d'	mRNA	30.3333	12.6667	-1.2495	2.64932e-06	3.39959e-05
16186	'Il2rg'	mRNA	13.6667	6.66667	-1.02526	0.00716566	0.0327135
16372	'Irx2'	mRNA	14	0.666667	-4.38195	7.92415e-11	1.96665e-09
16373	'Irx3'	mRNA	3.66667	0.333333	-3.44906	0.00207935	0.0118081
16819	'Lcn2'	mRNA	12	33.6667	1.49865	1.1712e-08	2.21327e-07
16875	'Lhx8'	mRNA	2.33333	6.66667	1.52494	0.0101415	0.0434715
170720	'Card14'	mRNA	6.70667	1.69	-1.97821	0.00206058	0.0117172
171166	'Mcoln3'	mRNA	2.33333	0	-3.79699	0.0109131	0.0461027
17121	'Mxd3'	mRNA	15.3333	5.66667	-1.42573	0.000219613	0.00172986
17427	'Mns1'	mRNA	9.66667	20.4833	1.09373	0.000495866	0.00348917
17528	'Mpz'	mRNA	49.3333	234.667	2.26035	3.7357e-88	2.26157e-85
17829	'Muc1'	mRNA	5.66667	13.3333	1.24483	0.00183534	0.0106544
17884	'Myh4'	mRNA	5.66667	16.6667	1.56676	3.37771e-05	0.000332109
18205	'Ntf3'	mRNA	7.33333	18	1.30582	0.000171611	0.00139453
19153	'Prx'	mRNA	31.6667	78.6667	1.32315	2.09414e-15	8.76487e-14
20303	'Ccl4'	mRNA	3.66667	0.666667	-2.44906	0.00933141	0.0405477
20311	'Cxcl5'	mRNA	3	7.66667	1.364	0.0112181	0.0471448
20609	'Sstr5'	mRNA	2.66667	7.33333	1.4698	0.00869284	0.0382286
208084	'Pif1'	mRNA	2.33333	6.66667	1.52494	0.0101415	0.0434715
20849	'Stat4'	mRNA	38.3333	11.6667	-1.70584	2.74752e-11	7.23185e-10
210510	'Tdrd6'	mRNA	15.6667	7	-1.1519	0.00155339	0.00925538
211623	'Plac9a'	mRNA	6.64667	2.14667	-1.62017	0.00751415	0.0341024
214189	'Scgn'	mRNA	9.33333	31.6667	1.77287	4.36599e-10	1.00011e-08
21462	'Tcp10b'	mRNA	2	6.27	1.65883	0.00804866	0.0359981
216343	'Tph2'	mRNA	11.6667	4.66667	-1.31156	0.00249068	0.0137254
216350	'Tspan8'	mRNA	7.33333	2.66667	-1.44906	0.00968466	0.0418307
216984	'Evi2b'	mRNA	9.33333	1.66667	-2.47506	3.00853e-05	0.000301761
217203	'Tmem106a'	mRNA	16.3333	7.66667	-1.08078	0.00214605	0.0121299
21954	'Tnni3'	mRNA	6.66667	2.33333	-1.50421	0.0112123	0.0471378
21955	'Tnnt1'	mRNA	40	13	-1.61112	6.51863e-11	1.63216e-09
21957	'Tnnt3'	mRNA	0.666667	3.66667	2.4698	0.00874985	0.0384046
22029	'Traf1'	mRNA	2.66667	7.33333	1.4698	0.00869284	0.0382286
22139	'Ttr'	mRNA	11.3333	49.6667	2.14207	8.18065e-19	4.78173e-17
22178	'Tyrp1'	mRNA	9.33333	3.66667	-1.33756	0.00602556	0.0284749
22355	'Vipr2'	mRNA	8.66667	30.3333	1.81772	5.17848e-10	1.17668e-08
225518	'Prdm6'	mRNA	19.6667	7.33333	-1.41284	3.23197e-05	0.000320756
226896	'Tfap2d'	mRNA	38.3333	16	-1.25016	1.28084e-07	2.11201e-06
22787	'Zp2'	mRNA	1	4.33333	2.12584	0.00921936	0.0401174
228576	'Mall'	mRNA	21.3333	10	-1.08274	0.000443288	0.0031692
229323	'Gpr171'	mRNA	0.333333	3.66667	3.4698	0.00195381	0.0112268
229841	'Cenpe'	mRNA	10.3333	22.6667	1.14363	0.000145809	0.00120684
230779	'Serinc2'	mRNA	270.667	121	-1.15114	1.78298e-39	3.1158e-37
230822	'Ncmap'	mRNA	7	14	1.01037	0.00696062	0.0319322
233064	'Wdr62'	mRNA	12.3333	26.6667	1.12284	4.92154e-05	0.000462444
23937	'Mab21l2'	mRNA	7.33333	0.666667	-3.44906	1.33749e-05	0.000146459
239743	'Klhl6'	mRNA	12.3333	25.6667	1.0677	0.000131696	0.00110023
240322	'Adamts19'	mRNA	3.66667	13.3333	1.87286	2.62031e-05	0.00026581
240327	'Gm4951'	mRNA	7.66667	2	-1.92823	0.00119855	0.00744744
24115	'Best1'	mRNA	8.33333	17.3333	1.06695	0.00168896	0.00994772
243634	'Ano2'	mRNA	16	54.3333	1.77413	2.88215e-16	1.32759e-14
268465	'Eme1'	mRNA	1.67	7.34667	2.14761	0.000644503	0.00437875
271144	'Ankdd1b'	mRNA	0.886667	4.69	2.41349	0.00343521	0.0178785
27412	'Peg12'	mRNA	0	4	4.59533	0.000423389	0.00304363
28253	'Slco1b2'	mRNA	11	4	-1.44906	0.00153344	0.00914935
319772	'C130050O18Rik'	mRNA	12.3333	6	-1.02916	0.0103921	0.0442383
320145	'Sp8'	mRNA	43	90.6667	1.0866	3.12067e-13	1.01533e-11
320558	'Sycp2'	mRNA	21	10.3333	-1.01272	0.000967852	0.00622149
330096	'Shisa3'	mRNA	8.33333	26.3333	1.67029	4.82805e-08	8.44585e-07
330355	'Dnah6'	mRNA	11.6667	25	1.1099	9.86655e-05	0.000855926
338403	'Cndp1'	mRNA	1.66667	6	1.85836	0.00502456	0.024538
380924	'Olfm4'	mRNA	5.66667	14.6667	1.38234	0.000395239	0.00286434
381359	'Prdm12'	mRNA	7	16	1.20301	0.000892585	0.00582603
381409	'Cdh26'	mRNA	1	4.33333	2.12584	0.00921936	0.0401174
381493	'S100a7a'	mRNA	18.3333	6.33333	-1.52307	2.19243e-05	0.000227302
381741	'Lrrc43'	mRNA	2	7	1.81772	0.00283657	0.0152305
381917	'Dnah3'	mRNA	8.66667	17.3333	1.01037	0.00267454	0.0145471
385354	'Frmd7'	mRNA	15.92	81.93	2.37392	9.21966e-34	1.25026e-31
407814	'BC053393'	mRNA	1.33333	5	1.91726	0.00891355	0.0389919
431706	'Zfp457'	mRNA	2.33333	7	1.59533	0.00647609	0.03015
433801	'Gm13212'	mRNA	10.0733	3.98667	-1.32692	0.00457229	0.0227287
54140	'Avpr1a'	mRNA	1.66667	6.33333	1.93637	0.00304666	0.0161792
545260	'Arsi'	mRNA	18.3333	9	-1.01611	0.00199085	0.0114049
545279	'Ms4a15'	mRNA	1.66667	18.3333	3.4698	4.34525e-12	1.2463e-10
54612	'Sfrp5'	mRNA	5	12	1.2734	0.00262387	0.0143359
56720	'Tdo2'	mRNA	5.66667	12.3333	1.13236	0.00544518	0.0262294
574404	'Gm14685'	mRNA	7.96	0	-5.56736	3.92852e-07	5.96171e-06
57765	'Tbx21'	mRNA	3	9	1.59533	0.00202056	0.0115477
58207	'Slc43a3'	mRNA	5	11	1.14787	0.00796084	0.0357184
58522	'Trim54'	mRNA	3	0	-4.15956	0.00298425	0.0159126
626596	'Rgs22'	mRNA	2	8	2.01037	0.00064175	0.00436179
628870	'Otogl'	mRNA	8.66667	17.3333	1.01037	0.00267454	0.0145471
629499	'Mroh8'	mRNA	15.6667	7.33333	-1.08479	0.00256976	0.0140971
64136	'Sdf2l1'	mRNA	307.667	130	-1.23249	1.5389e-49	4.07592e-47
65956	'Ccl21c'	mRNA	7.66	19.5	1.35842	5.54058e-05	0.000511956
665033	'Col6a5'	mRNA	5	12.6667	1.3514	0.00121036	0.00750982
666329	'Gm3317'	mRNA	5.19667	15.7133	1.6067	4.12793e-05	0.000394656
66696	'Snx31'	mRNA	2	7.33333	1.88484	0.00174016	0.0102138
66722	'Spag16'	mRNA	4	12	1.59533	0.000364156	0.0026699
67182	'Pdzk1ip1'	mRNA	4.33333	0.666667	-2.69007	0.00290821	0.0155659
67405	'Nts'	mRNA	45.6667	21.3333	-1.08767	2.48791e-07	3.93768e-06
69387	'Dnajb13'	mRNA	2	6.33333	1.67333	0.00736419	0.0335025
69398	'Cdhr4'	mRNA	4	11.3333	1.51287	0.000860513	0.00564714
69716	'Trip13'	mRNA	5.33333	14.3333	1.43663	0.000310667	0.00233324
71878	'Fam83d'	mRNA	18	39.3333	1.13812	6.23123e-07	9.09781e-06
71908	'Cldn23'	mRNA	7	14.3333	1.04431	0.00501834	0.0245217
73324	'Clhc1'	mRNA	2.33333	0	-3.79699	0.0109131	0.0461027
74116	'Pi16'	mRNA	7.33333	2.33333	-1.64171	0.00458862	0.0227831
74413	'Tc2n'	mRNA	0.666667	3.66667	2.4698	0.00874985	0.0384046
74485	'Lrrc71'	mRNA	1.94667	7.60333	1.97599	0.0010009	0.00639274
75317	'Parpbp'	mRNA	3.71667	12.2933	1.73616	0.000127137	0.00106847
75512	'Gpx6'	mRNA	2.66667	7.66667	1.53393	0.00562301	0.0269711
76905	'Lrg1'	mRNA	21.3333	50.6667	1.25829	9.07289e-10	1.99216e-08
77647	'Trat1'	mRNA	5.66667	12	1.09283	0.00771924	0.0348419
78617	'Cstad'	mRNA	9	22.3333	1.32157	2.39616e-05	0.00024557
78709	'Spink8'	mRNA	10.6667	26.6667	1.33229	3.4031e-06	4.25413e-05
78977	'Popdc3'	mRNA	8	3	-1.40467	0.00830609	0.0368481
83813	'Tnk1'	mRNA	2.63333	0	-3.97149	0.00606604	0.0285944
93674	'Nat8f3'	mRNA	163.323	77.8533	-1.05853	1.39498e-21	9.77122e-20
97114	'Hist2h3c2'	mRNA	34.84	9	-1.94238	3.95315e-12	1.14547e-10
97848	'Serpinb6c'	mRNA	3	0.333333	-3.15956	0.00731293	0.0333006
99899	'Ifi44'	mRNA	15	6	-1.31156	0.000604853	0.00415432
