# Supplementary material for: Surgery-induced neuroinflammatory transcriptional programs in medial prefrontal cortex of mice during early phase of perioperative neurocognitive disorders
Source: PeerJ journal article supplement (doi:10.7717/peerj.18664), 2024-12-03
Supplement: Supplemental_Table_S3.docx [file Supplemental_Table_S3.docx]

**Table. S3 Functional properties of genes selected for qRT-PCR analysis.**

| **Gene ID** | **Symbol** | **log2Ratio** | **Up/Down-regulation** | **Pathway and related function** |
| --- | --- | --- | --- | --- |
| 22139 | *Ttr* | 2.14 | Up | Endocrine system; thyroid hormone transport |
| 13058 | *Cybb* | 2.09 | Up | Signal transduction; HIF-1 signaling pathway; superoxide metabolic process |
| 22355 | *Vipr2* | 1.82 | Up | Neuroactive ligand-receptor interaction; enables G protein-coupled peptide receptor activity |
| 214189 | *Scgn* | 1.77 | Up | Calcium ion binding; regulation of long-term synaptic potentiation |
| 243634 | *Ano2* | 1.77 | Up | Olfactory transduction; chloride transmembrane transport |
| 16819 | *Lcn2* | 1.50 | Up | Immune system; IL-17 signaling pathway |
| 20311 | *Cxcl5* | 1.36 | Up | Immune response; chemokine signaling pathway |
| 65956 | *Ccl21c* | 1.36 | Up | Immune system; chemokine signaling pathway |
| 76905 | *Lrg1* | 1.26 | Up | Transforming growth factor beta receptor binding |
| 12487 | *Cd28* | 1.09 | Up | Immune system; T cell receptor signaling pathway |
| 14599 | *Gh* | -1.99 | Down | Signaling molecules and interaction; enables growth hormone receptor binding activity |
| 20849 | *Stat4* | -1.71 | Down | Signal transduction; STAT family of transcription factors |
| 15552 | *Htr1d* | -1.25 | Down | Enables G protein-coupled serotonin receptor activity and serotonin binding activity |
| 67405 | *Nts* | -1.09 | Down | Enables neuropeptide receptor binding activity and receptor ligand activity |
| 11606 | *Agt* | -1.09 | Down | Renin-angiotensin system; regulation of long-term neuronal synaptic plasticity |
